# Supplementary material for: Anti-Inflammatory Property of the Essential Oil from Cinnamomum camphora (Linn.) Presl Leaves and the Evaluation of Its Underlying Mechanism by Using Metabolomics Analysis
Source: PubMed Central journal article supplement (PMC7587563; doi:10.3390/molecules25204796), 2020-10-19
Supplement: molecules-25-04796-s001.pdf [file molecules-25-04796-s001.pdf]

# Supplementary Materials

Article

## Anti-Inflammatory Property of the Essential Oil from *Cinnamomum camphora* (Linn.) Presl Leaves and the Evaluation of Its Underlying Mechanism by Using Metabolomics Analysis

Jiali Chen <sup>1,2</sup>, Cailin Tang <sup>1</sup>, Yang Zhou <sup>1</sup>, Rongfei Zhang <sup>1</sup>, Shaoxia Ye <sup>1</sup>, Zhimin Zhao <sup>1</sup>, Ligen Lin <sup>2,\*</sup> and Depo Yang <sup>1,\*</sup>

<sup>1</sup> School of Pharmaceutical Sciences, Sun Yat-Sen University, Guangzhou 510006, China; chenjli26@mail2.sysu.edu.cn (J.C.); tangclin@mail2.sysu.edu.cn (C.T.); zhouy596@mail2.sysu.edu.cn (Y.Z.); zhangrf7@mail2.sysu.edu.cn (R.Z.); yeshx9@mail2.sysu.edu.cn (S.Y.); zhaozhm2@mail.sysu.edu.cn (Z.Z.)

<sup>2</sup> State Key Laboratory of Quality Research in Chinese Medicine, Institute of Chinese Medical Sciences, University of Macau, Avenida da Universidade, Taipa, Macau 999078, China

\* Correspondence: ligenl@um.edu.mo (L.L.); lssydp@mail.sysu.edu.cn (D.Y.); Tel.: +853-88228041 (L.L.); +86-020-39943043 (D.Y.)

Academic Editors: Elisa Ovidi and Antonio Tiezzi

Received: 19 September 2020; Accepted: 16 October 2020; Published: 19 October 2020

**Table S1. Chemical composition of EO.**

| No | Compounds                                               | RI   | Percentage (%) |
|----|---------------------------------------------------------|------|----------------|
| 1  | Linalool                                                | 1099 | 31.85%         |
| 2  | Eucalyptol                                              | 1032 | 19.16%         |
| 3  | Isoborneol                                              | 1157 | 9.47%          |
| 4  | $\alpha$ -Terpineol                                     | 1190 | 8.47%          |
| 5  | Camphor                                                 | 1144 | 4.78%          |
| 6  | Bicyclo[3.1.0]hexane, 4-methylene-1-(1-methylethyl)-    | 974  | 4.22%          |
| 7  | Caryophyllene                                           | 1419 | 2.86%          |
| 8  | Humulene                                                | 1579 | 1.58%          |
| 9  | $\alpha$ -Pinene                                        | 937  | 1.48%          |
| 10 | Naphthalene                                             | 1486 | 1.33%          |
| 11 | (-)-Spathulenol                                         | 1576 | 1.22%          |
| 12 | Terpinen-4-ol                                           | 1182 | 1.06%          |
| 13 | $\beta$ -Pinene                                         | 937  | 1.05%          |
| 14 | Bicyclo[3.1.1]heptane, 6,6-dimethyl-2-methylene-, (1S)- | 943  | 1.05%          |
| 15 | 5-Isopropyl-2-methylbicyclo[3.1.0]hexan-2-ol            | 1075 | 0.98%          |
| 16 | Germacrene D                                            | 1432 | 0.95%          |
| 17 | 1-Hexanone, 1-phenyl-                                   | 1473 | 0.95%          |
| 18 | Propanoic acid, ethyl ester                             | 710  | 0.92%          |
| 19 | $\gamma$ -Muurolene                                     | 1477 | 0.80%          |
| 20 | $\beta$ -Ocimene                                        | 1038 | 0.48%          |
| 21 | Cyclohexane                                             | 1391 | 0.33%          |
| 22 | 2-Carene                                                | 1001 | 0.31%          |
| 23 | Camphene                                                | 952  | 0.29%          |
| 24 | $\gamma$ -Elemene                                       | 1434 | 0.28%          |
| 25 | Caryophyllene oxide                                     | 1581 | 0.28%          |
| 26 | Cis-Linaloloxide                                        | 1086 | 0.27%          |
| 27 | $\alpha$ -Phellandrene                                  | 1005 | 0.18%          |
| 28 | cis-3-Hexenyl iso-butyrate                              | 1145 | 0.18%          |

|              |                                       |      |              |
|--------------|---------------------------------------|------|--------------|
| 29           | $\beta$ -Myrcene                      | 991  | 0.17%        |
| 30           | 2,2'-Isopropylidenebis(5-methylfuran) | 1458 | 0.15%        |
| 31           | Copaene                               | 1376 | 0.14%        |
| 32           | (+)-4-Carene                          | 1009 | 0.13%        |
| 33           | Methyl Isobutyl Ketone                | 735  | 0.09%        |
| 34           | 4-Indolyl acetate                     | 1554 | 0.08%        |
| 35           | trans-Calamenene                      | 1529 | 0.07%        |
| 36           | $\gamma$ -Terpinene                   | 1060 | 0.06%        |
| 37           | Benzenamine, N-(1-methylethyl)-       | 1127 | 0.06%        |
| 38           | Ylangene                              | 1372 | 0.06%        |
| 39           | Longipinane                           | 1398 | 0.06%        |
| 40           | $\beta$ -Eudesmol                     | 1649 | 0.06%        |
| 41           | Trans-Carveol                         | 1090 | 0.05%        |
| 42           | Isospathulenol                        | 1549 | 0.05%        |
| 43           | 1-Propen-2-ol, acetate                | 609  | 0.04%        |
| 44           | Neointermedeol                        | 1660 | 0.04%        |
| 45           | n-Propyl acetate                      | 708  | 0.04%        |
| 46           | Aromandendrene                        | 1440 | 0.04%        |
| 47           | 9-Ethylbicyclo(3.3.1)nonan-9-ol       | 1292 | 0.04%        |
| 48           | endo-Borneol                          | 1167 | 0.04%        |
| 49           | Others                                |      | 1.75%        |
| <b>Total</b> |                                       |      | <b>100 %</b> |

RI: the retention index was calculated for all volatile constituents using a homologous series of n-alkanes C7-C40 on DB-5MS column.

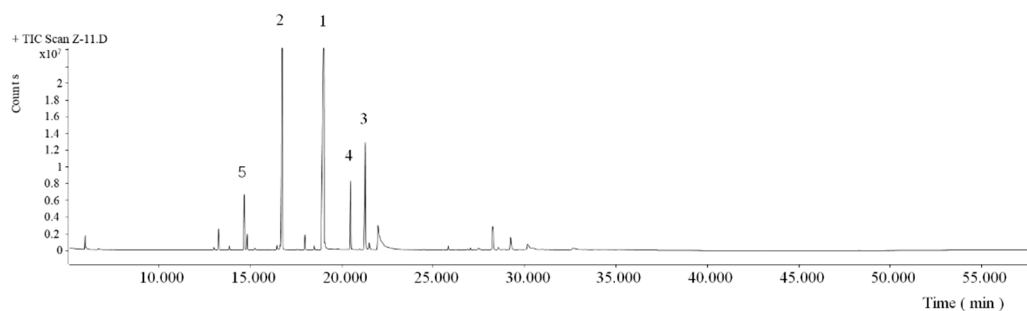

**Figure S1. GC chromatogram of EO.**

**Linalool (1) Eucalyptol (2) Isoborneol (3)  $\alpha$ -Terpineol (4) Camphor (5)**

The composition of EO was analyzed by an Agilent 7890A gas chromatographic (GC) instrument coupled to an Agilent 5975 mass spectrometer (MS) (Agilent Technologies, Inc., Santa Clara, CA, USA), equipped with an DB-5MS capillary column (40.00 m  $\times$  250.00  $\mu$ m  $\times$  0.25  $\mu$ m film thickness). The carrier gas, helium, was injected at a constant flow rate of 1.0 mL/min. The temperature of injector was 280  $^{\circ}$ C. The sample (1  $\mu$ L) was injected in the split mode (1:5). The initial oven temperature was 40  $^{\circ}$ C and was maintained at 40  $^{\circ}$ C for 5 min, then the oven temperature would be gradually raised to 280  $^{\circ}$ C at 5  $^{\circ}$ C /min and was finally maintained for 5 min. The mass spectrometer was operated at an ionization voltage of 70 eV and a mass range of 40-600  $m/z$ .
